# Supplementary material for: Cross-Validation of a Multiplex LC-MS/MS Method for Assaying mAbs Plasma Levels in Patients with Cancer: A GPCO-UNICANCER Study
Source: MDPI journal article supplement (doi:10.3390/ph14080796), 2021-08-12
Supplement: s1 [file s1]

# Supplementary Materials

**Table S1..** Accuracy and precision of Trastuzumab measured in plasma with mAbXmise kit. Results obtained with biosimilar of Trastuzumab (Ontruzant®) using two distinct peptides. <sup>a</sup>Precision is expressed as coefficient of variation (%).

| Trastuzumab<br>DTYIHWVR  | Nominal<br>concentration<br>(µg/mL) | Mean calculated<br>concentration<br>(µg/mL) | Precision <sup>a</sup><br>(%, n=6)) | Accuracy (%)<br>n=6 |
|--------------------------|-------------------------------------|---------------------------------------------|-------------------------------------|---------------------|
| Ontruzant®               |                                     |                                             |                                     |                     |
|                          | 6                                   | 6.3                                         | 8.9                                 | 104.7               |
|                          | 15                                  | 16.0                                        | 8.6                                 | 106.6               |
|                          | 75                                  | 79.7                                        | 4.0                                 | 106.3               |
| Trastuzumab<br>FTISADTSK | Nominal<br>concentration<br>(µg/mL) | Mean calculated<br>concentration<br>(µg/mL) | Precision <sup>a</sup><br>(%, n=6)) | Accuracy (%)<br>n=6 |
| Ontruzant®               |                                     |                                             |                                     |                     |
|                          | 6                                   | 5.9                                         | 2.1                                 | 99.8                |
|                          | 15                                  | 16.3                                        | 2.2                                 | 108.7               |
|                          | 75                                  | 82.8                                        | 2.7                                 | 110.4               |

**Table S2.** Intra-assay accuracy and precision of OTDM1 monoclonal antibodies measured in plasma spiked at 250 µg/mL and then diluted by 5in PBS 1X or plasma, with mAbXmise kit. Results obtained with originators drugs.  
<sup>a</sup> Precision is expressed as coefficient of variation.

| Within-run              |                                     |                                                |                                                   |                                     |
|-------------------------|-------------------------------------|------------------------------------------------|---------------------------------------------------|-------------------------------------|
|                         | Nominal<br>concentration<br>(µg/mL) | Mean<br>Calculated<br>concentration<br>(µg/mL) | Intra-day<br>precision <sup>a</sup><br>(%, n = 6) | Intra-day<br>accuracy<br>(%, n = 6) |
| <b>Bevacizumab</b>      |                                     |                                                |                                                   |                                     |
| <b>FTFSLDTSK</b>        |                                     |                                                |                                                   |                                     |
| PBS                     | 250                                 | 253.9                                          | 1.5                                               | 101.6                               |
| Plasma                  | 250                                 | 257.8                                          | 1.7                                               | 103.1                               |
| <b>Cetuximab</b>        |                                     |                                                |                                                   |                                     |
| <b>YASESGIPSR</b>       |                                     |                                                |                                                   |                                     |
| PBS                     | 250                                 | 259.8                                          | 2.8                                               | 103.9                               |
| Plasma                  | 250                                 | 256.3                                          | 2.3                                               | 102.5                               |
| <b>Ipilimumab</b>       |                                     |                                                |                                                   |                                     |
| <b>GLEWVTFISYDGNNK</b>  |                                     |                                                |                                                   |                                     |
| PBS                     | 250                                 | 284.9                                          | 9.32                                              | 114.0                               |
| Plasma                  | 250                                 | 234.2                                          | 8.91                                              | 93.7                                |
| <b>Nivolumab</b>        |                                     |                                                |                                                   |                                     |
| <b>ASGITFSNSGMHWVR</b>  |                                     |                                                |                                                   |                                     |
| PBS                     | 250                                 | 230.9                                          | 2.9                                               | 92.4                                |
| Plasma                  | 250                                 | 249.2                                          | 5.9                                               | 99.7                                |
| <b>Pembrolizumab</b>    |                                     |                                                |                                                   |                                     |
| <b>DLPLTFGGGTK</b>      |                                     |                                                |                                                   |                                     |
| PBS                     | 250                                 | 257.8                                          | 1.8                                               | 103.1                               |
| Plasma                  | 250                                 | 262.3                                          | 1.4                                               | 104.9                               |
| <b>Rituximab</b>        |                                     |                                                |                                                   |                                     |
| <b>FSGSGSGTSYSLTISR</b> |                                     |                                                |                                                   |                                     |
| PBS                     | 250                                 | 267.0                                          | 3.1                                               | 106.8                               |

|                    |     |       |     |       |
|--------------------|-----|-------|-----|-------|
| Plasma             | 250 | 263.8 | 6.4 | 105.5 |
| <b>Trastuzumab</b> |     |       |     |       |
| <b>DTYIHWVR</b>    |     |       |     |       |
| PBS                | 250 | 238.6 | 1.8 | 95.4  |
| Plasma             | 250 | 259.8 | 4.6 | 103.9 |
| <b>Trastuzumab</b> |     |       |     |       |
| <b>FTISADTSK</b>   |     |       |     |       |
| PBS                | 250 | 242.6 | 2.0 | 97.0  |
| Plasma             | 250 | 252.3 | 1.8 | 100.9 |
